# Supplementary material for: Extremely bulky copper(i) complexes of [HB(3,5-{1-naphthyl}2pz)3]− and [HB(3,5-{2-naphthyl}2pz)3]− and their self-assembly on graphene
Source: Royal Society of Chemistry journal article supplement (doi:10.1039/c6dt04851j), 2017-01-01

Supporting information for

# Extremely bulky copper(I) complexes of [HB(3,5-{1-naphthyl}<sub>2</sub>pz)<sub>3</sub>]<sup>-</sup> and [HB(3,5-{2-naphthyl}<sub>2</sub>pz)<sub>3</sub>]<sup>-</sup> and their self-assembly on graphene.

Thomas F. van Dijkman,<sup>a</sup> Hans M. de Bruijn,<sup>a</sup> Tobias G. Brevé,<sup>a</sup> Bob van Meijeren,<sup>a</sup> Maxime A. Siegler<sup>b</sup> and Elisabeth Bouwman<sup>a\*</sup>

*a*, Leiden Institute of Chemistry, Leiden University, P.O. Box 9502, 2300 RA, Leiden, the Netherlands.

*b*, Department of Chemistry, Johns Hopkins University, MD 21218, Baltimore, USA.

## NMR Spectra

|                                                                                                                             |   |
|-----------------------------------------------------------------------------------------------------------------------------|---|
| <sup>1</sup> H – HPz <sup>(1Nt)2</sup> in CD <sub>2</sub> Cl <sub>2</sub> .....                                             | 2 |
| <sup>13</sup> C – HPz <sup>(1Nt)2</sup> in CDCl <sub>3</sub> .....                                                          | 2 |
| <sup>1</sup> H – HPz <sup>(2Nt)2</sup> in DMSO- <i>d</i> <sub>6</sub> .....                                                 | 3 |
| <sup>13</sup> C – HPz <sup>(2Nt)2</sup> in DMSO- <i>d</i> <sub>6</sub> .....                                                | 3 |
| <sup>1</sup> H – KTP <sup>(1Nt)2</sup> •DMPU in CD <sub>2</sub> Cl <sub>2</sub> .....                                       | 4 |
| <sup>13</sup> C – KTP <sup>(1Nt)2</sup> in CD <sub>2</sub> Cl <sub>2</sub> .....                                            | 4 |
| <sup>1</sup> H – NaTp <sup>(2Nt)2</sup> •DMPU in CD <sub>2</sub> Cl <sub>2</sub> .....                                      | 5 |
| <sup>13</sup> C – NaTp <sup>(2Nt)2</sup> •DMPU in CD <sub>2</sub> Cl <sub>2</sub> .....                                     | 5 |
| <sup>1</sup> H – [Cu(Tp <sup>(1Nt)2</sup> )CO] in C <sub>6</sub> D <sub>6</sub> .....                                       | 6 |
| <sup>13</sup> C – [Cu(Tp <sup>(1Nt)2</sup> )CO] in C <sub>6</sub> D <sub>6</sub> .....                                      | 6 |
| <sup>1</sup> H – [Cu(Tp <sup>(2Nt)2</sup> )CO] in CD <sub>2</sub> Cl <sub>2</sub> .....                                     | 7 |
| <sup>13</sup> C – [Cu(Tp <sup>(2Nt)2</sup> )CO] in C <sub>6</sub> D <sub>6</sub> .....                                      | 7 |
| <sup>1</sup> H – [Cu(Tp <sup>(1Nt)2</sup> )C <sub>2</sub> H <sub>4</sub> ] in C <sub>6</sub> D <sub>6</sub> at 343K .....   | 8 |
| <sup>13</sup> C – [Cu(Tp <sup>(1Nt)2</sup> )C <sub>2</sub> H <sub>4</sub> ] in C <sub>6</sub> D <sub>6</sub> at 343 K ..... | 8 |
| <sup>1</sup> H – [Cu(Tp <sup>(2Nt)2</sup> )C <sub>2</sub> H <sub>4</sub> ] in C <sub>6</sub> D <sub>6</sub> .....           | 9 |
| <sup>13</sup> C – [Cu(Tp <sup>(2Nt)2</sup> )C <sub>2</sub> H <sub>4</sub> ] in C <sub>6</sub> D <sub>6</sub> .....          | 9 |

$^1\text{H} - \text{HPz}^{(1\text{Nt})2}$  in  $\text{CD}_2\text{Cl}_2$

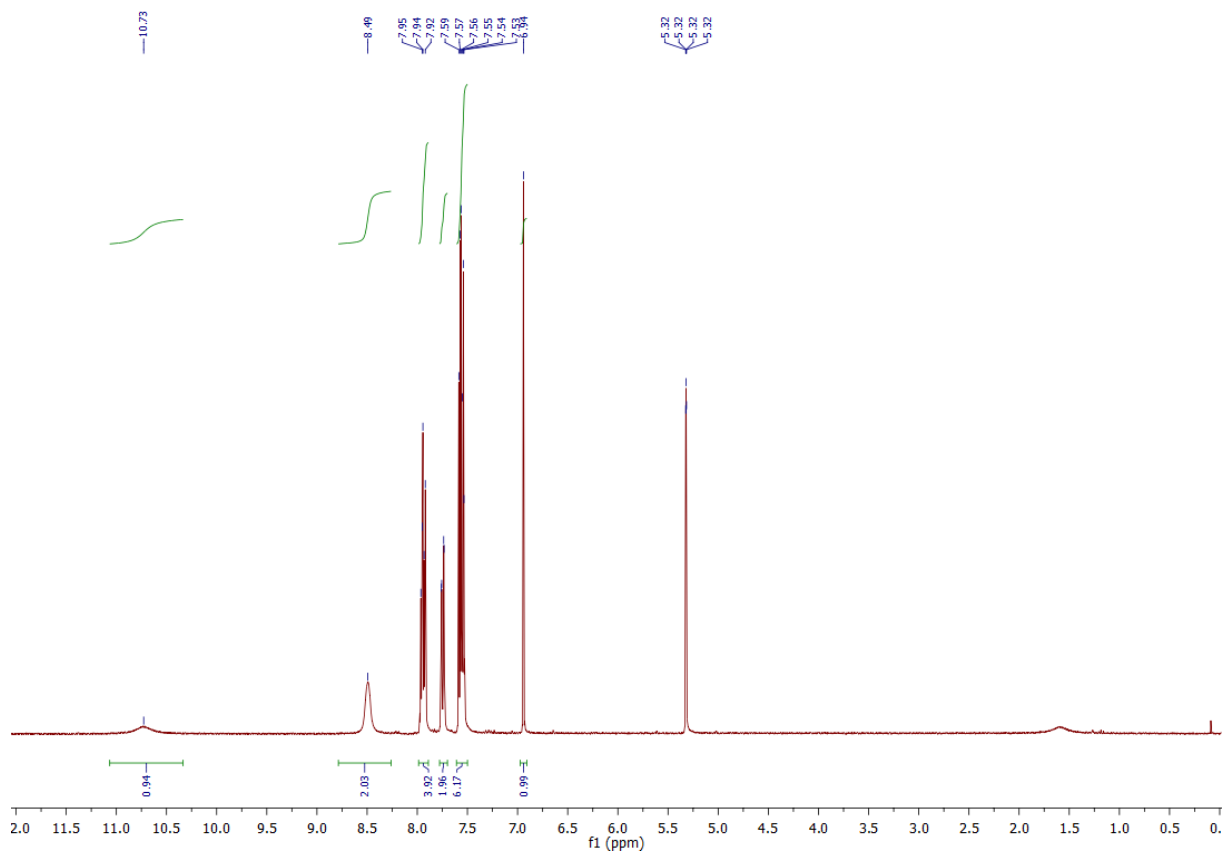

$^{13}\text{C} - \text{HPz}^{(1\text{Nt})2}$  in  $\text{CDCl}_3$

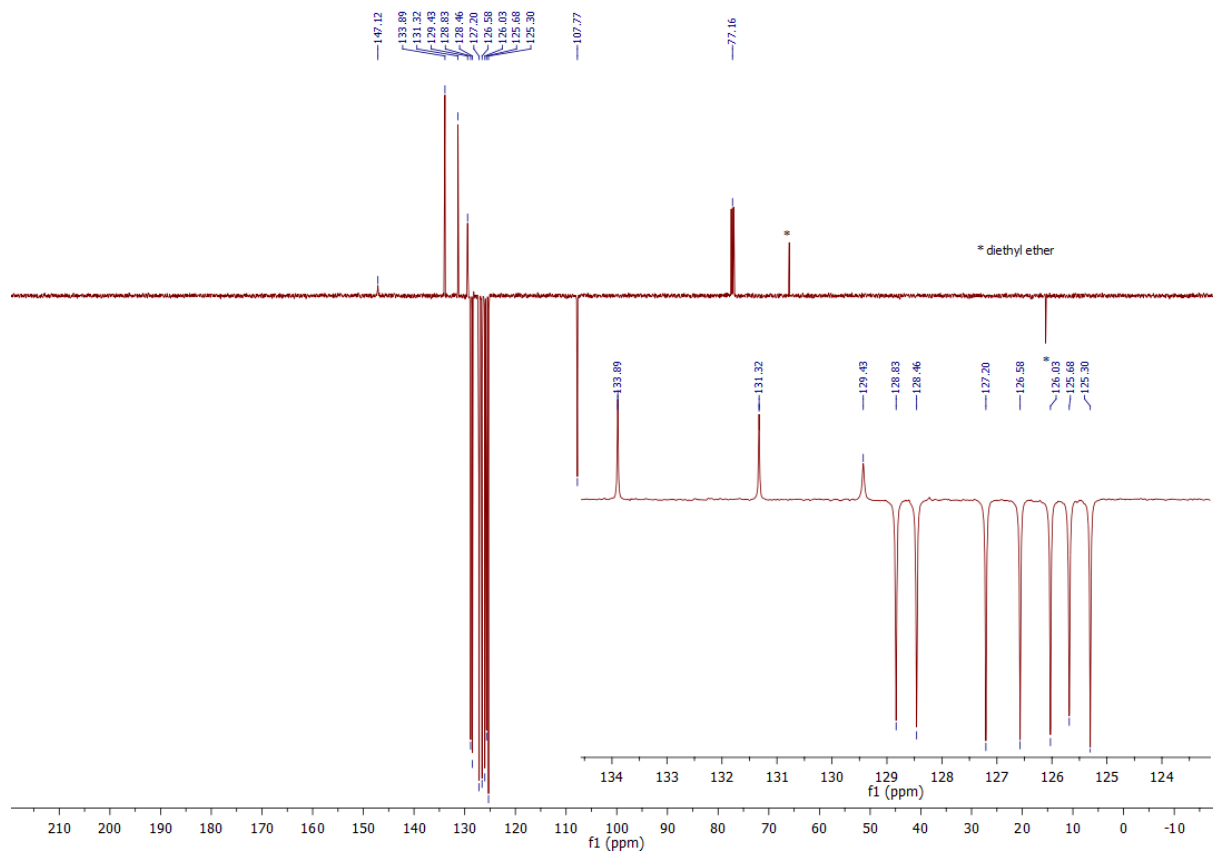

$^1\text{H} - \text{HPz}^{(2\text{Nt})2}$  in  $\text{DMSO-}d_6$

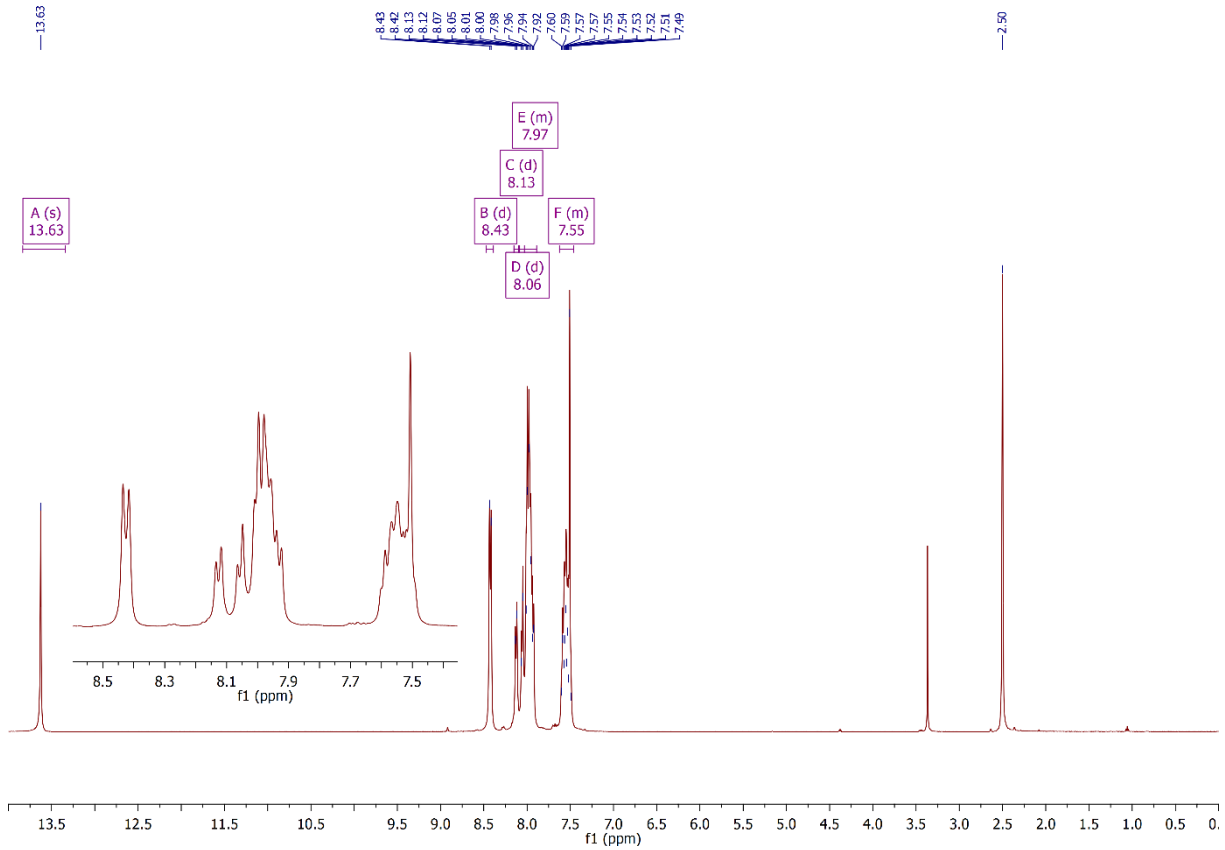

$^{13}\text{C} - \text{HPz}^{(2\text{Nt})2}$  in  $\text{DMSO-}d_6$

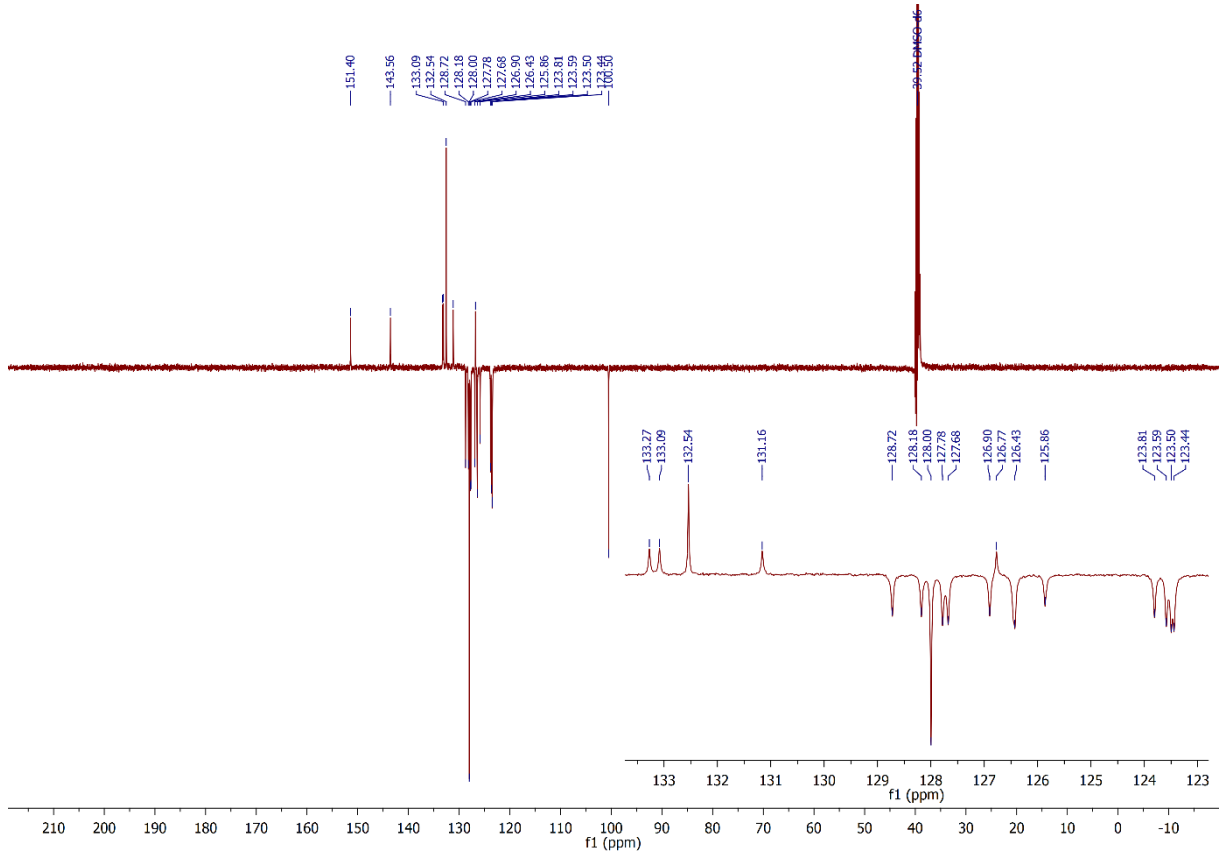

$^1\text{H} - \text{KTP}^{(1\text{Nt})2} \cdot \text{DMPU}$  in  $\text{CD}_2\text{Cl}_2$

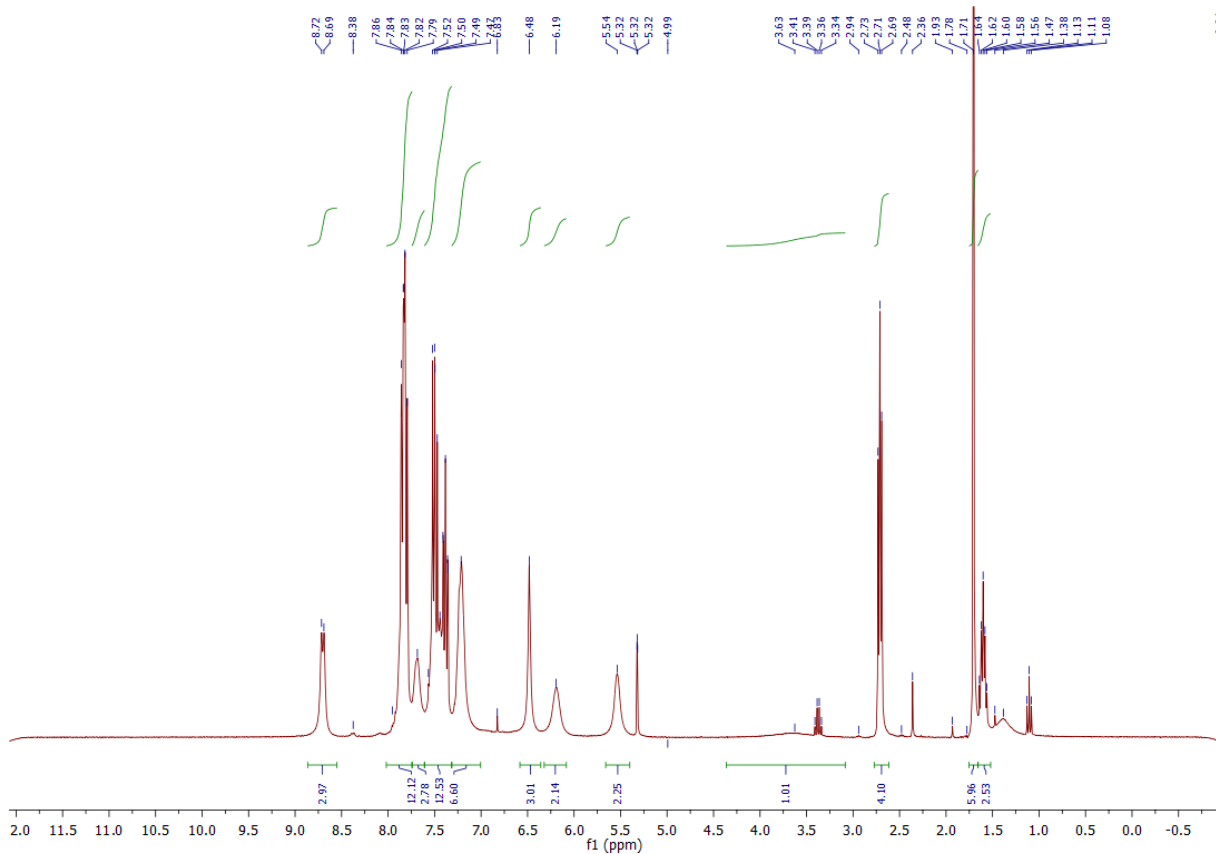

$^{13}\text{C} - \text{KTP}^{(1\text{Nt})2}$  in  $\text{CD}_2\text{Cl}_2$

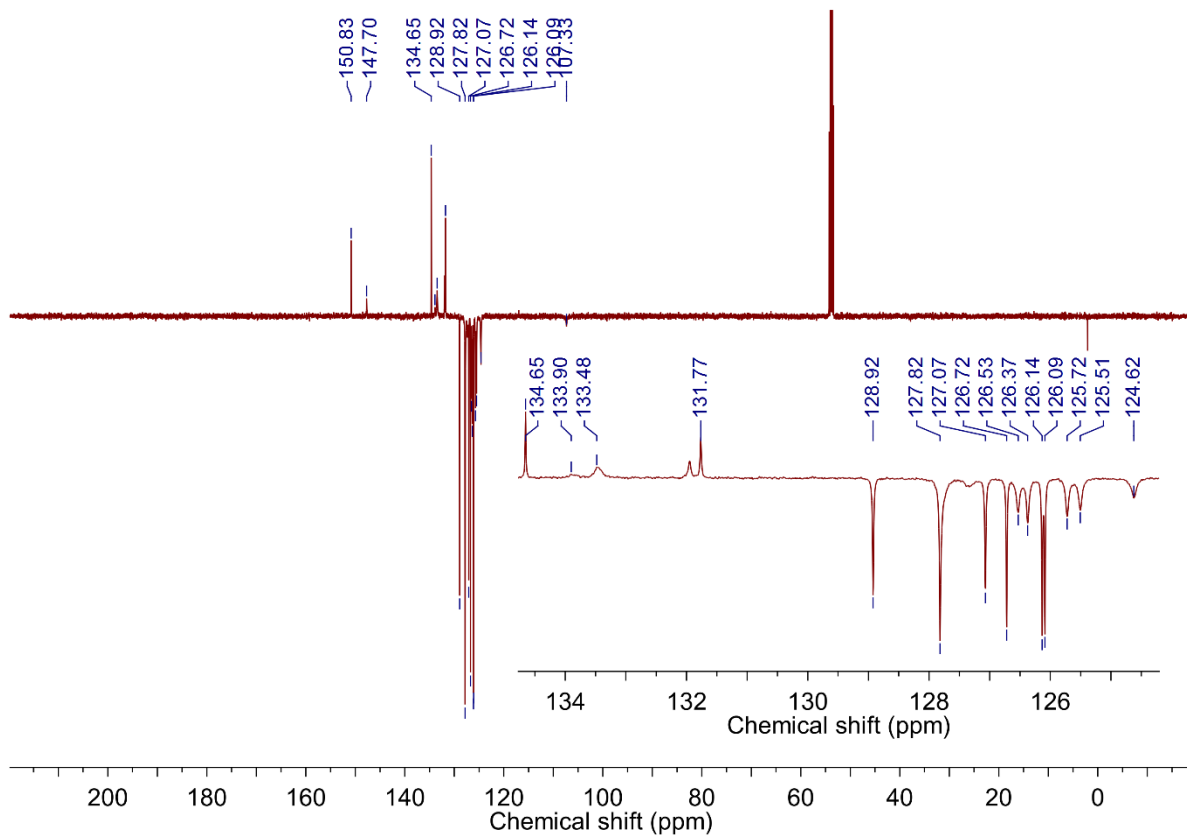

$^1\text{H} - \text{NaTp}^{(2\text{Nt})_2} \cdot \text{DMPU}$  in  $\text{CD}_2\text{Cl}_2$

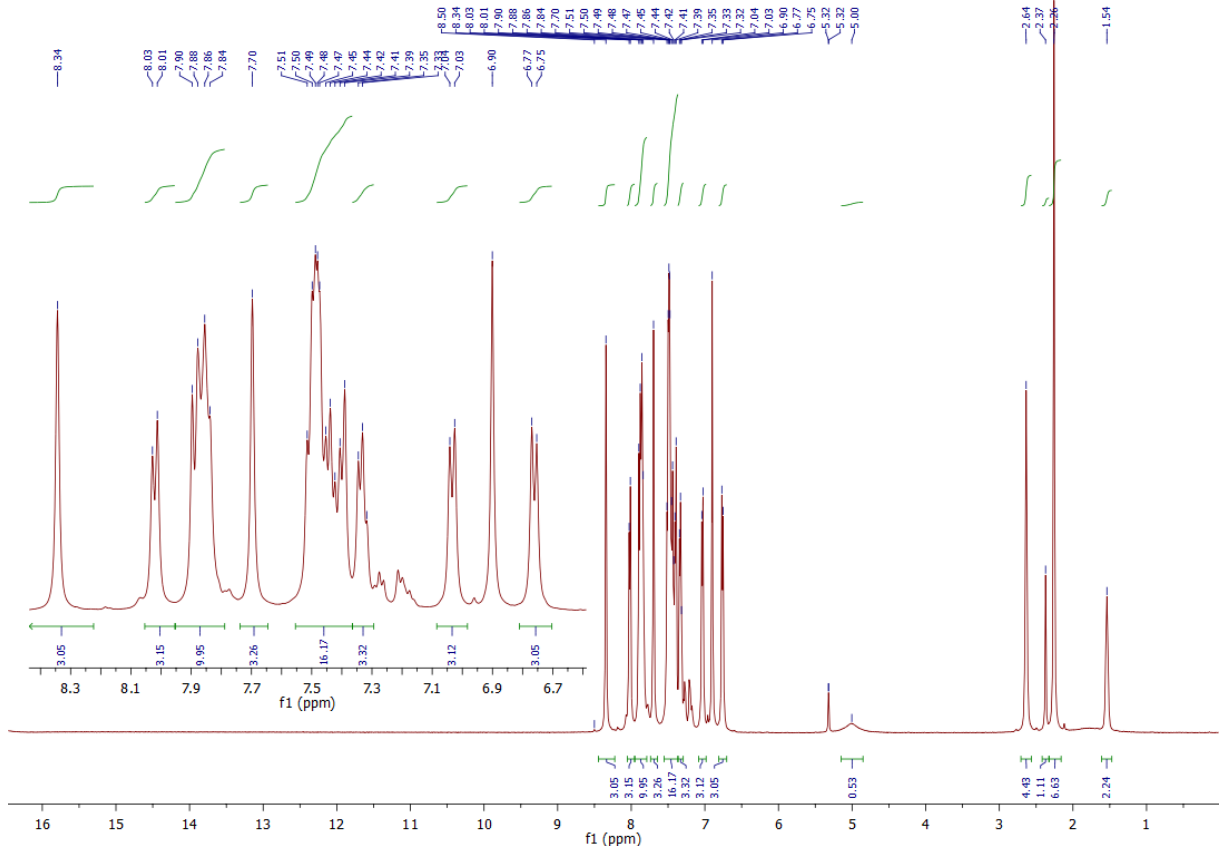

$^1\text{H} - [\text{Cu}(\text{Tp}^{(1\text{Nt})2})\text{CO}]$  in  $\text{C}_6\text{D}_6$

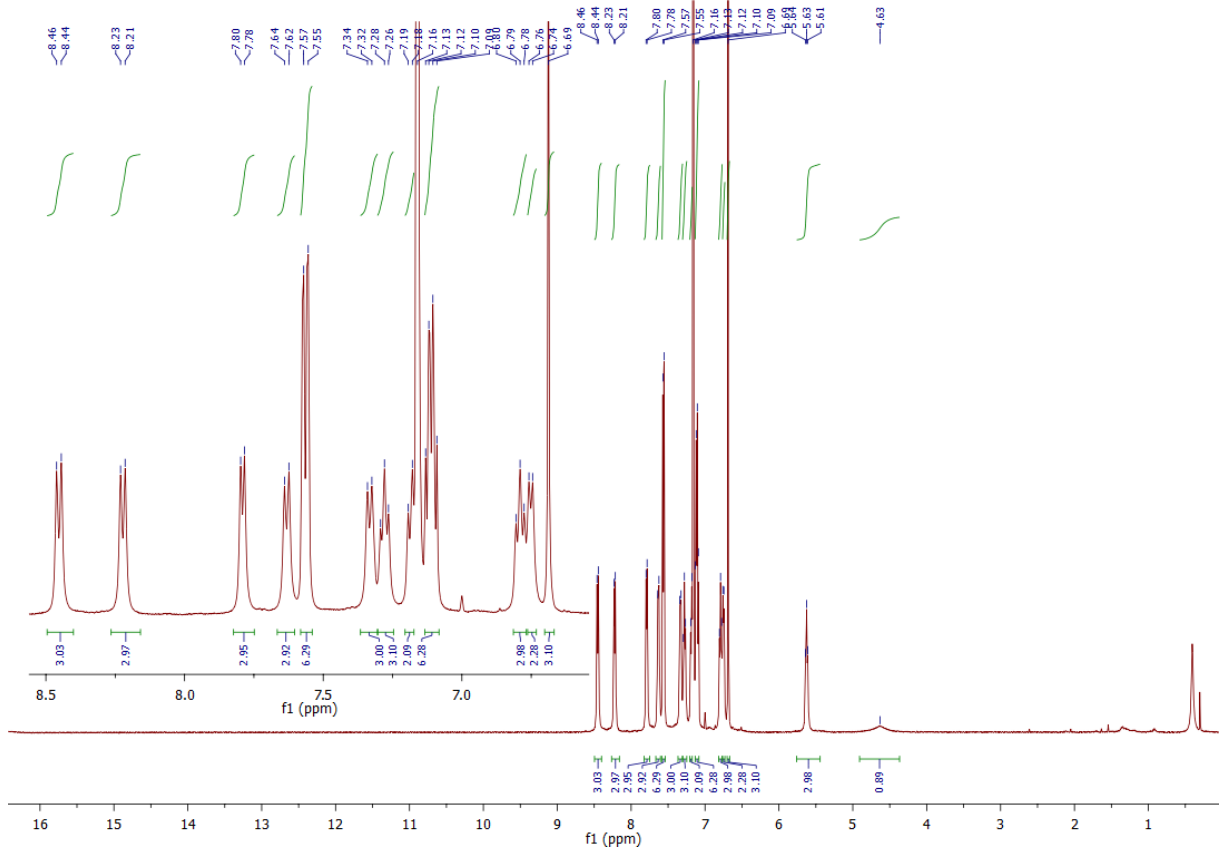

$^{13}\text{C} - [\text{Cu}(\text{Tp}^{(1\text{Nt})2})\text{CO}]$  in  $\text{C}_6\text{D}_6$

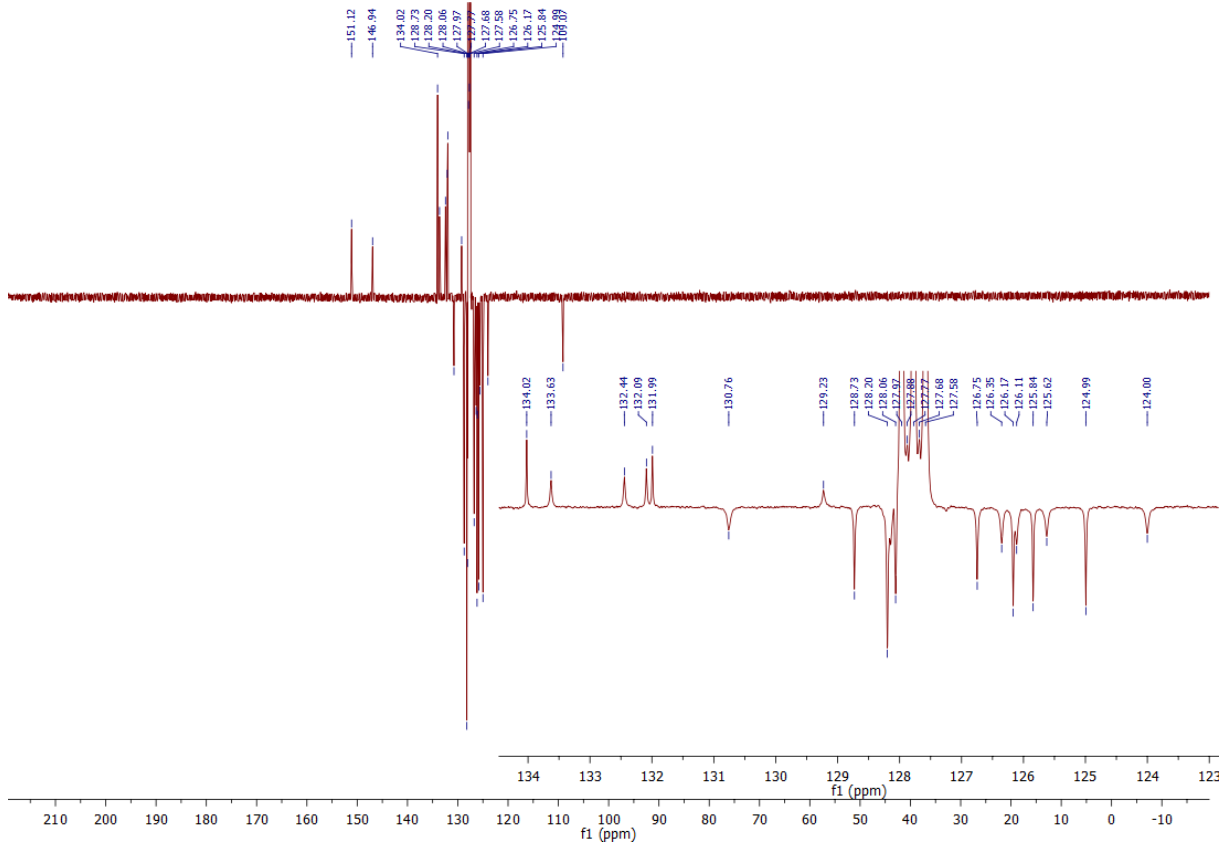

$^1\text{H} - [\text{Cu}(\text{Tp}^{(2\text{Nt})2})\text{CO}]$  in  $\text{CD}_2\text{Cl}_2$

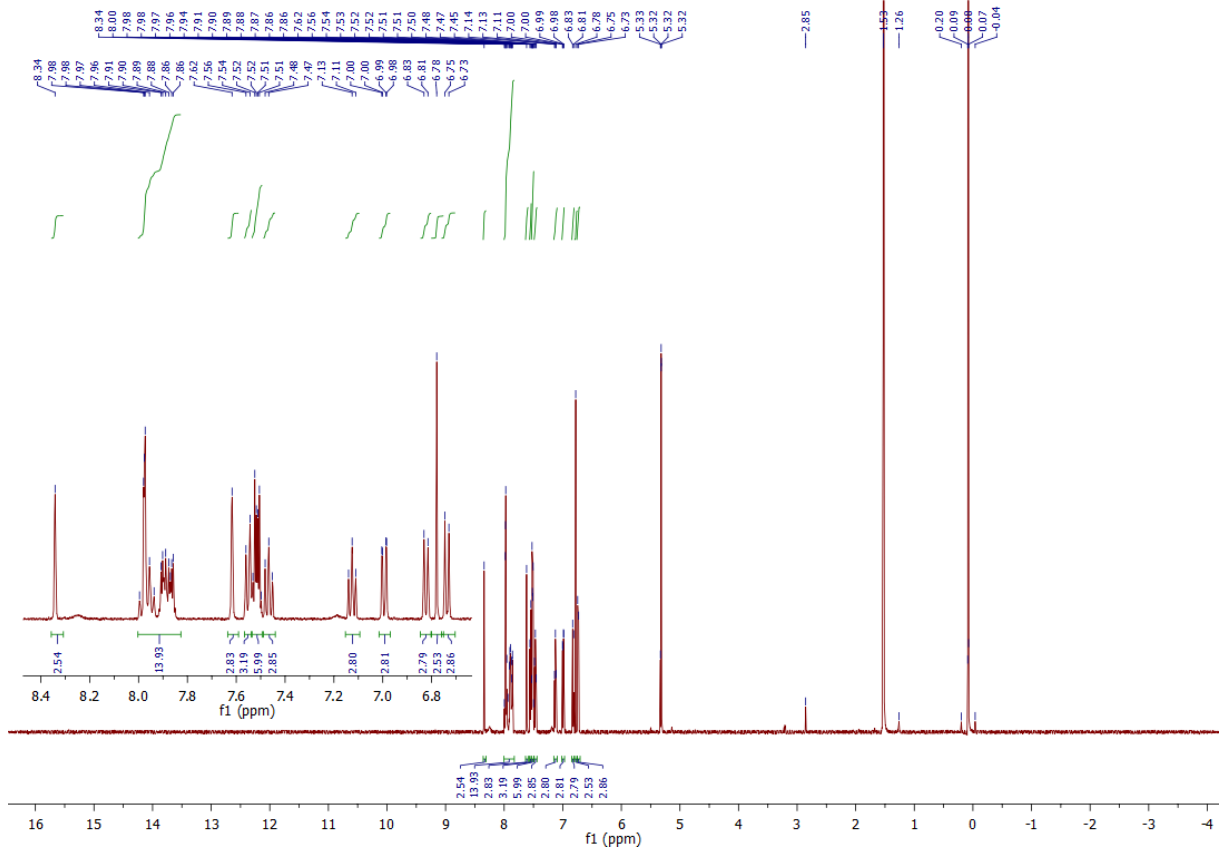





$^1\text{H} - [\text{Cu}(\text{Tp}^{(2\text{Nt})2})\text{C}_2\text{H}_4]$  in  $\text{C}_6\text{D}_6$

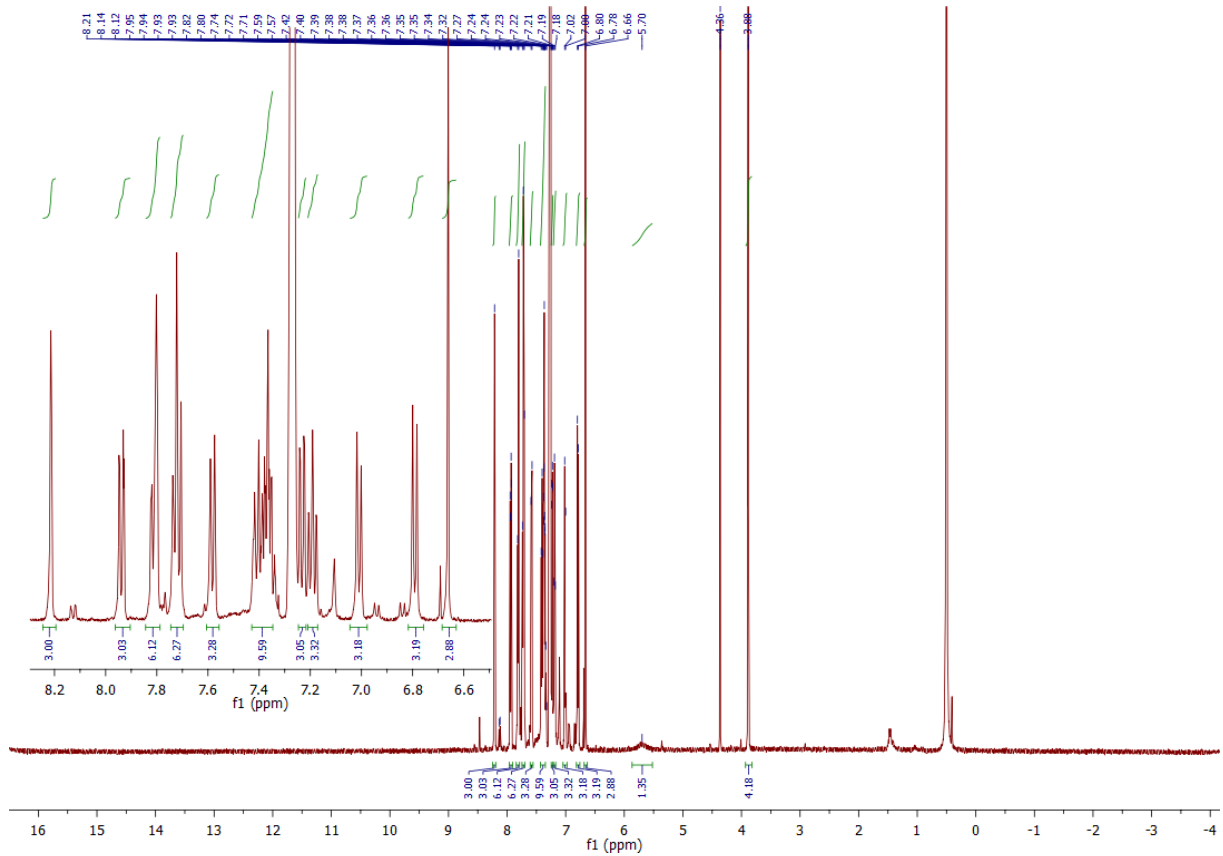

$^{13}\text{C} - [\text{Cu}(\text{Tp}^{(2\text{Nt})2})\text{C}_2\text{H}_4]$  in  $\text{C}_6\text{D}_6$

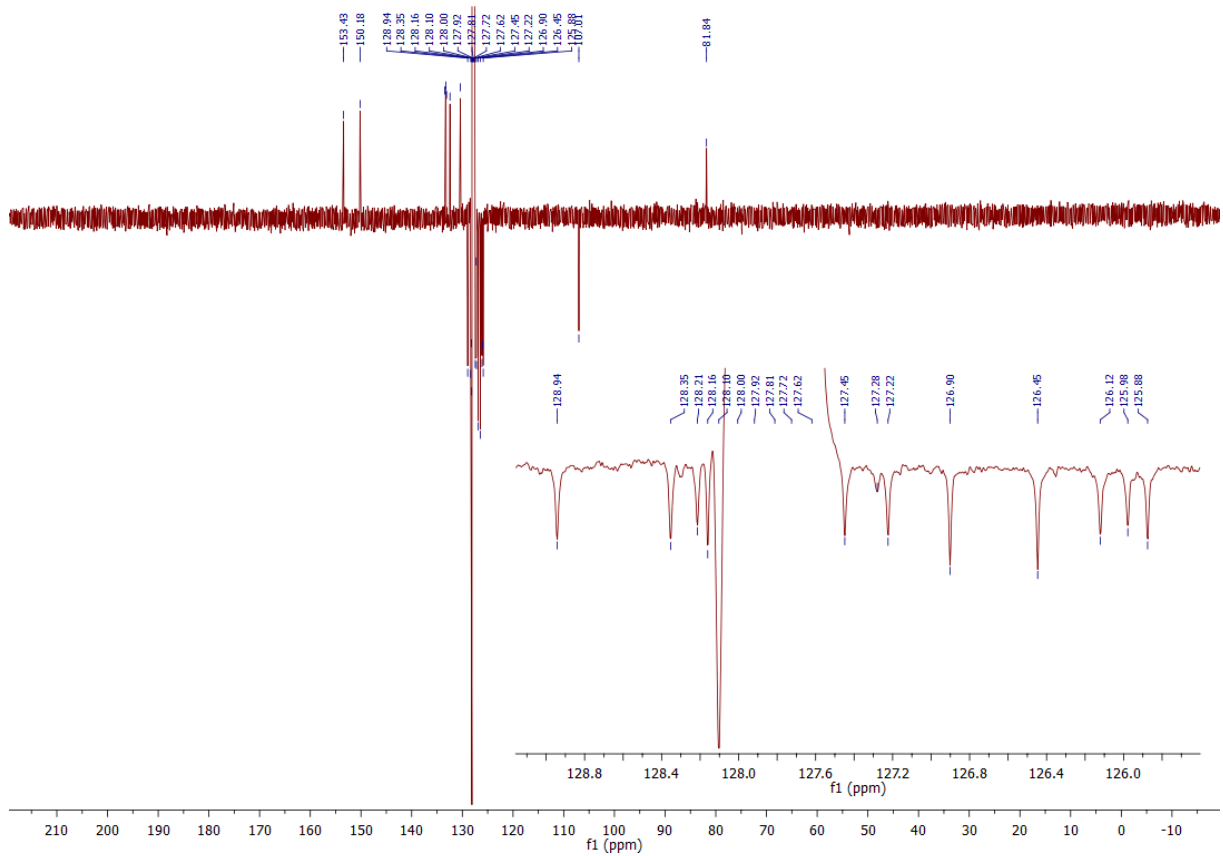

Supplement: c6dt04851j1.pdf [file c6dt04851j1.pdf]
